# Supplementary material for: Furin-dependent CCL17-fused recombinant toxin controls HTLV-1 infection by targeting and eliminating infected CCR4-expressing cells in vitro and in vivo
Source: PubMed Central journal article supplement (PMC4545545; doi:10.1186/s12977-015-0199-8), 2015-08-20
Supplement: 12977_2015_199_MOESM5_ESM.pdf [file 12977_2015_199_MOESM5_ESM.pdf]

| Number | Gender | Age | Diagnosis              | PVL    | Furin |
|--------|--------|-----|------------------------|--------|-------|
| 1      | Female | 65  | Carrier                | 0.31   | 23.53 |
| 2      | Female | 48  | HAM/TSP                | 34.69  | 23.05 |
| 3      | Female | 70  | Untreated ATL          | 0.49   | 17.35 |
| 4      | Female | 62  | Carrier                | 81.54  | 31.54 |
| 5      | Male   | 33  | Carrier                | 2.58   | 15.21 |
| 6      | Male   | 60  | Carrier                | 15.14  | 24.73 |
| 7      | Female | 55  | Carrier                | 0.23   | 25.84 |
| 8      | Male   | 58  | Carrier                | 21.70  | 17.88 |
| 9      | Female | 85  | Treated smoderling ATL | 44.2   | 30.43 |
| 10     | Female | 55  | Carrier                | 1.51   | 21.96 |
| 11     | Male   | 66  | Treated acute ATL      | 8.92   | 19.05 |
| 12     | Female | 38  | Carrier                | 0.02   | 18.89 |
| 13     | Female | 59  | Carrier                | 17.71  | 27.44 |
| 14     | Female | 30  | Carrier                | 1.04   | 22.99 |
| 15     | Female | 53  | Carrier                | 0.38   | 19.18 |
| 16     | Female | 65  | Carrier                | 1.60   | 17.62 |
| 17     | Female | 44  | Carrier                | 17.21  | 34.01 |
| 18     | Female | 64  | Untreated Chronic ATL  | 39.82  | 19.43 |
| 19     | Female | 58  | Carrier                | 123.07 | 56.09 |
| 20     | Male   | 51  | Carrier                | 0.64   | 13.81 |
| 21     | Female | 51  | Carrier                | 0.38   | 11.61 |
| 22     | Female | 53  | Carrier                | 0.97   | 25.83 |
| 23     | Female | 42  | Carrier                | 0.50   | 19.64 |
| 24     | Female | 60  | Untreated Chronic ATL  | 62.98  | 23.72 |
| 25     | Male   | 38  | Carrier                | 5.98   | 35.47 |
| 26     | Female | 50  | Carrier                | 2.47   | 4.80  |
| 27     | Male   | 34  | Carrier                | 15.81  | 21.37 |
| 28     | Female | 37  | Carrier                | 0.67   | 19.76 |
| 29     | Female | 74  | Carrier                | 0.05   | 3.10  |

PVL is presented as copies/100 cells.

Furin is presented as the level relative to that in Jurkat cells.

**Table S2**
