# Supplementary material for: Furin-dependent CCL17-fused recombinant toxin controls HTLV-1 infection by targeting and eliminating infected CCR4-expressing cells in vitro and in vivo
Source: PubMed Central journal article supplement (PMC4545545; doi:10.1186/s12977-015-0199-8), 2015-08-20
Supplement: 12977_2015_199_MOESM6_ESM.pdf [file 12977_2015_199_MOESM6_ESM.pdf]

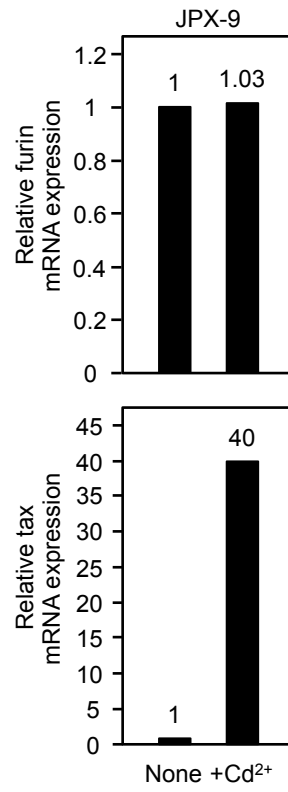

**Figure S4**
